# Supplementary material for: Large CO2 seeps and hydrates field in the Indian Ocean (Mayotte Island)
Source: Research Square preprint supplement (doi:10.21203/rs.3.rs-4720763/v1), 2024-08-01
Supplement: Supplementary file 1 [file 7d35ff838672527a4d6da186.xlsx]

## Sheet: Flow_rate_details
DIVE	DATE	TIME	LATITUDE	LONGITUDE	IMMERSION	Sample Number	Tool	SITE	Time to fill (s)	% filled	Volume (ml)	Flow rate (ml/s)	Typology	COMMENT
14	2021-05-20	18:39:50	-12.8313	45.3806	1356.14	GFL-PL783-14-DEB02 #A	Funnel	Site B0	12	1	530	44.1667	High Flow rate	*ECH:GFL-PL783-14-DEB02 #A, after destruction of small hydrate and appearance of a CO2 fountain
14	2021-05-20	18:41:10	-12.8313	45.3806	1356.14	GFL-PL783-14-DEB02 #B	Funnel	Site B0	13	1	530	40.7692	High Flow rate	GFL-PL783-14-DEB02 #B, after destruction of small hydrate and appearance of a CO2 fountain
14	2021-05-20	18:42:14	-12.8313	45.3806	1356.14	GFL-PL783-14-DEB02 #C	Funnel	Site B0	10	1	530	53	High Flow rate	*ECH:GFL-PL783-14-DEB02 #C, after destruction of small hydrate and appearance of a CO2 fountain
14	2021-05-20	18:54:06	-12.8314	45.3805	1353.28	GFL-PL783-14-DEB03 #A	Funnel	Site B0	4	1	530	132.5	High Flow rate	*ECH:GFL-PL783-14-DEB03 #A
14	2021-05-20	23:44:01	-12.8309	45.3805	1370.24	GFL-PL783-14-DEB06 #A	Funnel	Site B0	8	1	530	66.25	High Flow rate	*ECH: GFL-PL783-14-DEB06#A
14	2021-05-20	23:45:23	-12.8309	45.3805	1370.31	GFL-PL783-14-DEB06 #B	Funnel	Site B0	7	1	530	75.7143	High Flow rate	*ECH:GFL-PL783-14-DEB06#B
14	2021-05-20	22:10:27	-12.8313	45.3807	1356.28	GFL-PL783-14-DEB05 #B	Funnel	Site B0	12	1	530	44.1667	High Flow rate	ECH:GFL-PL783-14-DEB-05#B
10	2021-05-11	02:43:08	-12.8271	45.3818	1450.72	GFL-PL779-10-DEB01	Funnel	Site G0	23	0.75	397.5	17.2826	Medium Flow rate	*ECH: GFL-PL-779-10 DEB01
10	2021-05-11	10:49:33	-12.8314	45.3807	1352.53	GFL-PL779-10-DEB04	Funnel	Site B0	33	1	530	16.0606	Medium Flow rate	*ECH:GFL-PL-779-10-DEB3
10	2021-05-11	10:56:59	-12.8314	45.3807	1352.67	GFL-PL779-10-DEB06	Funnel	Site B0	47	1	530	11.2766	Medium Flow rate	*ECH:GFL-PL-779-10-DEB5
7	2021-04-30	23:07:31	-12.8243	45.4102	1509.39	GFL-PL776-07-DEB01	Funnel	Site E0	37	1	530	14.3243	Medium Flow rate	GFL-PL776-07-DEB01
7	2021-05-01	06:43:15	-12.8217	45.392	1261.39	GFL-PL776-07-DEB02	Funnel	Site D1	45	1	530	11.7778	Medium Flow rate	sampling droplets
14	2021-05-20	22:08:34	-12.8313	45.3807	1356.35	GFL-PL783-14-DEB05 #A	Funnel	Site B0	25	1	530	21.2	Medium Flow rate	ECH:GFL-PL783-14-DEB-05#A
14	2021-05-20	22:11:31	-12.8313	45.3807	1356.28	GFL-PL783-14-DEB05 #C	Funnel	Site B0	17	1	530	31.1765	Medium Flow rate	ECH:GFL-PL783-14-DEB-05#C
14	2021-05-20	18:29:46	-12.8313	45.3806	1356.07	GFL-PL783-14-DEB01 #A	Funnel	Site B0	47	1	530	11.2766	Medium Flow rate	*ECH:GFL-PL783-14-DEB-01 #A, on small hydrate
10	2021-05-11	10:39:15	-12.8316	45.3808	1346.54	GFL-PL779-10-DEB02	Funnel	Site B0	36	1	530	14.7222	Medium Flow rate	*ECH:GFL-PL-779--DEB1
10	2021-05-11	10:41:18	-12.8316	45.3808	1346.54	GFL-PL779-10-DEB03	Funnel	Site B0	40	1	530	13.25	Medium Flow rate	*ECH:GFL-PL-779-10-DEB2
14	2021-05-20	19:59:15	-12.8313	45.3807	1356.62	GFL-PL783-14-DEB04 #A	Funnel	Site B0	17	1	530	31.1765	Medium Flow rate	*ECH:GFL-PL783-14-DEB-04#A
14	2021-05-20	20:01:35	-12.8313	45.3807	1356.62	GFL-PL783-14-DEB04 #B	Funnel	Site B0	18	1	530	29.4444	Medium Flow rate	*ECH:GFL-PL783-14-DEB-04#B
10	2021-05-11	10:52:20	-12.8314	45.3807	1352.6	GFL-PL779-10-DEB05	Funnel	Site B0	230	0.666667	353.333	1.53623	Low Flow rate	*ECH:GFL-PL-779-10-DEB4
14	2021-05-20	18:31:12	-12.8313	45.3806	1356.07	GFL-PL783-14-DEB01 #B	Funnel	Site B0	60	1	530	8.83333	Low Flow rate	*ECH:GFL-PL783-14-DEB-01 #B, on small hydrate
7	2021-05-02	02:19:05	-12.835	45.384	1219.62	GFL-PL776-07-DEB03	Funnel	Site C1	80	1	530	6.625	Low Flow rate
