# Supplementary material for: Large CO2 seeps and hydrates field in the Indian Ocean (Mayotte Island)
Source: Research Square preprint supplement (doi:10.21203/rs.3.rs-4720763/v1), 2024-08-01
Supplement: Supplementary file 2 [file 8473d59d2b9586a1b5b763b4.docx]

Extended Data Table 1. Estimates of seeping flow rates and their density repartition in the Horseshoe area.

| **A Flow rates estimates** |  |  |  |
| --- | --- | --- | --- |
|  |  |  |  |
| **Class type** | **Low flow rate** | **Medium flow rate** | **High flow rate** |
|  | <10 ml/s | 10 - 40 ml/s | > 40 ml/s |
|  |  |  |  |
| **Flow rates (ml/s)** | 1.54 | 17.28 | 44.17 |
|  | 8.83 | 16.06 | 40.77 |
|  | 6.63 | 11.28 | 53.00 |
|  |  | 14.32 | 132.50 |
|  |  | 11.78 | 66.25 |
|  |  | 21.20 | 75.71 |
|  |  | 31.18 | 44.17 |
|  |  | 11.28 |  |
|  |  | 14.72 |  |
|  |  | 13.25 |  |
|  |  | 31.18 |  |
|  |  | 29.44 |  |
|  |  |  |  |
| **Number of seeping points** | 3 | 12 | 7 |
| **Average (ml/s)** | 5.66 | 18.58 | 65.22 |
| **Standard deviation (ml/s)** | 3.74 | 7.77 | 32.33 |
| **Median (ml/s)** | 6.63 | 15.39 | 53.00 |
| **Confidence interval 0.9 (ml/s)** | 3.55 | 3.69 | 20.10 |
|  |  |  |  |
| **B. Density Estimates** |  |  |  |
|  |  |  |  |
|  | **Number of seeping points observed by the ROV Victor 6000 on site B0** | **Density of seeping points (/m²)** |  |
| **Low flow rate** | 23 | 0.0013 |  |
| **Medium flow rate** | 119 | 0.0068 |  |
| **High flow rate** | 17 | 0.0010 |  |
|  |  |  |  |
| **Average** | - | 0.0030 |  |
| **Standard deviation** |  | 0.0033 |  |

Extended Data Table 2. Number of observations of distinct taxa at the different level of identification in the Horseshoe area.

| **Class** | **Order** | **Family** | **Gender** | ***Morphotype*** | **n** |
| --- | --- | --- | --- | --- | --- |
| Anthozoa | Alcyonacea* | Alcyoniina |  |  | 10 |
| Anthozoa | Alcyonacea | Isididae |  |  | 59 |
| Anthozoa | Alcyonacea | Chrysogorgiidae |  |  | 129 |
| Anthozoa | Alcyonacea | Chrysogorgiidae | Iridogorgia |  | 9 |
| Anthozoa | Antipatharia |  |  |  | 2 |
| Anthozoa | Antipatharia | Schizopathidae |  |  | 22 |
| Anthozoa | Zoantharia** |  |  |  | 2 |
| Anthozoa | Actiniaria |  |  |  | 45 |
| Anthozoa | Actiniaria | Actinoscyphiidae |  |  | 5 |
| Anthozoa |  |  |  | Large gorgonian | 47 |
| Anthozoa |  |  |  | Feathery gorgonian | 38 |
| Anthozoa |  |  |  | Purple gorgonian-like | 96 |
| Anthozoa |  |  |  | Red gorgonian-like | 63 |
| Anthozoa |  |  |  | Yellow gorgonian-like | 210 |
| Anthozoa |  |  |  | White gorgonian-like | 39 |
| Anthozoa |  |  |  | Finger-like | 39 |
| Anthozoa |  |  |  | Parallel vertical branches | 57 |
| Anthozoa |  |  |  | Whip-like | 151 |
| Anthozoa |  |  |  | Pennatulacea*** | 3 |
| Anthozoa |  |  |  | White coral-like | 591 |
| Anthozoa |  |  |  | Pink coral-like | 1 |
| Anthozoa |  |  |  | Yellow coral-like | 328 |
| Anthozoa |  |  |  |  | 61 |

Extended Data Table. 3. Estimated Carbon fluxes for every seeping site in the Horseshoe area.

|  |  | **Estimated flux - density repartition site B0** | | | | **Estimated flux - density repartition site B0 error on density estimates 50%** | | | |
| --- | --- | --- | --- | --- | --- | --- | --- | --- | --- |
| **Sites** | **Area of active seeping site** | **Low Flow Rate** | **Medium Flow Rate** | **High Flow Rate** | **Total** | **Low Flow Rate** | **Medium Flow Rate** | **High Flow Rate** | **Total** |
|  | m² | tC/y | tC/y | tC/y | tC/y | tC/y | tC/y | tC/y | tC/y |
| A0 | 4300 | 752.8 | 17284.7 | 8667.8 | 26705.2 | 623.7 | 11268.3 | 6102.6 | 17994.7 |
| A1 | 2400 | 420.2 | 9647.2 | 4837.8 | 14905.3 | 348.1 | 6289.3 | 3406.1 | 10043.5 |
| A2 | 2300 | 402.7 | 9245.3 | 4636.3 | 14284.2 | 333.6 | 6027.3 | 3264.2 | 9625.0 |
| B0 | 17500 | 3063.8 | 70344.5 | 35275.8 | 108684.1 | 2538.3 | 45859.5 | 24836.3 | 73234.0 |
| B1 | 5600 | 980.4 | 22510.2 | 11288.3 | 34778.9 | 812.2 | 14675.0 | 7947.6 | 23434.9 |
| C0 | 5300 | 927.9 | 21304.3 | 10683.5 | 32915.8 | 768.7 | 13888.9 | 7521.8 | 22179.5 |
| C1 | 5000 | 875.4 | 20098.4 | 10078.8 | 31052.6 | 725.2 | 13102.7 | 7096.1 | 20924.0 |
| C2 | 4200 | 735.3 | 16882.7 | 8466.2 | 26084.2 | 609.2 | 11006.3 | 5960.7 | 17576.2 |
| C3 | 4700 | 822.8 | 18892.5 | 9474.1 | 29189.5 | 681.7 | 12316.6 | 6670.3 | 19668.6 |
| C4 | 1200 | 210.1 | 4823.6 | 2418.9 | 7452.6 | 174.1 | 3144.7 | 1703.1 | 5021.8 |
| D0 | 2600 | 455.2 | 10451.2 | 5241.0 | 16147.4 | 377.1 | 6813.4 | 3690.0 | 10880.5 |
| D1 | 500 | 87.5 | 2009.8 | 1007.9 | 3105.3 | 72.5 | 1310.3 | 709.6 | 2092.4 |
| E0 | 2800 | 490.2 | 11255.1 | 5644.1 | 17389.5 | 406.1 | 7337.5 | 3973.8 | 11717.4 |
| F0 | 100 | 17.5 | 402.0 | 201.6 | 621.1 | 14.5 | 262.1 | 141.9 | 418.5 |
| G0 | 3400 | 595.3 | 13666.9 | 6853.6 | 21115.8 | 493.2 | 8909.8 | 4825.3 | 14228.3 |
|  | m² | GtC/y | GtC/y | GtC/y | GtC/y | GtC/y | GtC/y | GtC/y | GtC/y |
| **Entire Horseshoe** | 61900 | 1.08E-05 | 2.49E-04 | 1.25E-04 | 3.84E-04 | 8.98E-06 | 1.62E-04 | 8.78E-05 | 2.59E-04 |

The estimated fluxes are calculated for every active seeping site in the Horseshore area considering that all sites display the same density repartition of flow rates as site B0. An error of 50% is considered on this density hypothesis.
